# Supplementary material for: Supercapacitors with cotton shell-derived activated carbons and porous polymer electrolyte films
Source: Royal Society of Chemistry journal article supplement (doi:10.1039/d5ra00696a), 2025-01-01
Supplement: d5ra00696a1.pdf [file d5ra00696a1.pdf]

### Supplementary Information

#### 1. Photographic image of raw cotton shells

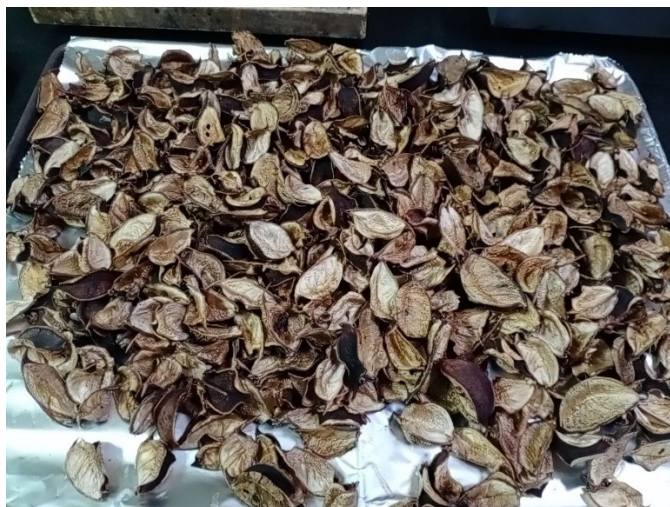

**Fig.1:** Raw cotton shells after being washed with DI water

#### 2. FESEM images of Porous Polymer(PP) film

(a)

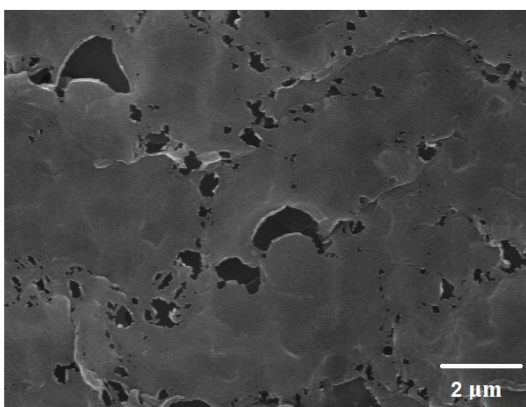

(b)

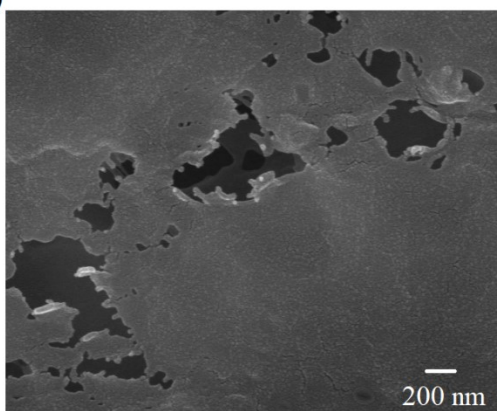

**Fig. 2:** FESEM images of dried PP film at different magnifications
